# Supplementary material for: Effects of Daily Low-Dose Date Consumption on Glycemic Control, Lipid Profile, and Quality of Life in Adults with Pre- and Type 2 Diabetes: A Randomized Controlled Trial
Source: PubMed Central journal article supplement (PMC7019638; doi:10.3390/nu12010217), 2020-01-15
Supplement: nutrients-12-00217-s001.pdf [file nutrients-12-00217-s001.pdf]

**Table S1.** Daily dietary intakes of subjects at baseline and during the 16-week intervention.

|                       |      | BASAL (control) 16 week | (control) BASAL(3 dates/day) 16 week | (3 dates/day) | (3 dates/day) |
|-----------------------|------|-------------------------|--------------------------------------|---------------|---------------|
| Energy                | kcal | 2216±55.44              | 2.230±64.63                          | 2.233±61.00   | 2.230±64.63   |
| Protein               | g    | 81.18±12.70             | 87.86±17.43                          | 86.86±16.43   | 89.86±18.43   |
| Fat                   | g    | 70.86±15.40             | 76.36±15                             | 72.46±17      | 70.36±12      |
| Saturated fatty acids | g    | 22.56±4.70              | 23.43±6.30                           | 29.43±6.65    | 21.43±8.30    |
| Cholesterol           | mg   | 379.61±20.44            | 361.54±45.55                         | 371.54±67.88  | 361.54±55.77  |
| Carbohydrate          | g    | 356.86±45.44            | 292.86±71                            | 272.86±67     | 262.86±43     |
| Total dietary fibers  | g    | 14.33±4.90              | 16.66±3.06                           | 14.56±3.06    | 11.60±3.06    |

\*Data compared to basal by Wilcoxon signed rank test. No statistically differences were found pre-after
